# Supplementary material
Source: PubMed Central journal article supplement (PMC4960007)
Supplement: NIHMS756198-supplement-Supp_Appendix.pdf [file NIHMS756198-supplement-Supp_Appendix.pdf]

Web-Based Supplementary Materials for “Global Rank Tests for  
Multiple, Possibly Censored, Outcomes” by Ritesh  
Ramchandani, David Schoenfeld, and Dianne Finkelstein

## 1 Web Appedix A: Consistency of Variance Estimate in Equation (3)

We want to show that the variance estimate given in equation (3) is a consistent estimate of the asymptotic variance given in equation (2) under  $H_0$ . Consider the first term of the asymptotic variance,  $\frac{1}{\lambda}E[\phi(\mathbf{r}_{ij})\phi(\mathbf{r}_{ij'})]$ . Since we assume  $\frac{N}{n} \rightarrow \frac{1}{\lambda}$ , it suffices to show that  $\hat{\xi}_1 \xrightarrow{P} \xi_1$ , where  $\hat{\xi}_1 = \frac{1}{nm^2}[\sum_i^n \sum_j^m \sum_{j' \neq j}^m \phi(\mathbf{r}_{ij})\phi(\mathbf{r}_{ij'})]$  and  $\xi_1 = E[\phi(\mathbf{r}_{ij})\phi(\mathbf{r}_{ij'})]$ . Observe that  $U = \frac{2}{nm(m-1)} \sum_i^n \sum_j^m \sum_{j' < j}^m [\phi(\mathbf{r}_{ij})\phi(\mathbf{r}_{ij'})]$  is itself a U-statistic, and thus converges to the expected value of its kernel, which is  $\xi_1$ , under the condition that  $\phi^4(\mathbf{r}_{ij}) < \infty$ . We can rewrite  $U$  as  $\frac{1}{nm(m-1)} \sum_i^n \sum_j^m \sum_{j' \neq j}^m \phi(\mathbf{r}_{ij})\phi(\mathbf{r}_{ij'})$ , which makes it easy to see that  $\hat{\xi}_1$  is asymptotically equivalent to  $U$ , and thus converges to  $\xi_1$ . In a similar manner, we can show  $\frac{N}{(nm)^2} \sum_i^n \sum_{i' \neq i}^n \sum_j^m \phi(\mathbf{r}_{ij})\phi(\mathbf{r}_{i'j}) \xrightarrow{P} \frac{1}{1-\lambda}E[\phi(\mathbf{r}_{ij})\phi(\mathbf{r}_{i'j})]$ , which completes the proof.

## 2 Web Appendix B: Optimal Weights for Weighted Test Statistics

The proof follows the same argument given in Minas et al. [1] Let  $\delta_w = \mathbf{w}'\boldsymbol{\theta}_\phi(\mathbf{w}'\boldsymbol{\Lambda}\mathbf{w})^{-1/2}$ . As described in section 2.3, maximizing power corresponds to maximizing  $\delta_w$  when  $\boldsymbol{\theta}_\phi \geq 0$ , or minimizing  $\delta_w$  when  $\boldsymbol{\theta}_\phi \leq 0$ . Equivalently, we want to maximize  $\delta_w^2$  with respect to  $w$ . The generalized Cauchy-Schwarz inequality states that for any positive-definite matrix  $\Sigma$ ,  $(\gamma'y)^2 \leq \gamma'\Sigma\gamma y'y^{-1}$  [2, lemma 5.3.2]. It follows that if  $\boldsymbol{\Lambda}$  is positive-definite,  $\delta_w^2 \leq \frac{\mathbf{w}'\boldsymbol{\Lambda}\mathbf{w}\boldsymbol{\theta}'_\phi\boldsymbol{\Lambda}^{-1}\boldsymbol{\theta}_\phi}{\mathbf{w}'\boldsymbol{\Lambda}\mathbf{w}} = \boldsymbol{\theta}'_\phi\boldsymbol{\Lambda}^{-1}\boldsymbol{\theta}_\phi$ .  $\delta_w^2$  attains the maximum for  $\mathbf{w} = \boldsymbol{\Lambda}^{-1}\boldsymbol{\theta}_\phi$ .

### 3 Web Appendix C: ALS Simulation Model

We used a shared parameter model for generation of ALS and survival data in simulation scenario 2. Per Healy and Schoenfeld [3], the ALSFRS model is given by:

$$ALSFRS_{ij} = \beta_0 + \beta_1 \times time_{ij} + \beta_2 \times time_{ij} \times treat_i + b_{0,i} + b_{1,i} \times time_{ij} + \epsilon_{ij}$$

where the  $\beta$  are fixed effects, the  $b_i$  are patient specific random effects for subject  $i$ , and  $e_{ij}$  are independent error terms that are normally distributed, i.e.  $e_{ij} \sim N(0, 4.35)$ . The  $b_i$  follow a mean 0 bivariate normal distribution:

$$\begin{pmatrix} b_{0,i} \\ b_{1,i} \end{pmatrix} = N \begin{pmatrix} 0 & 28.38 & 0.79 \\ 0, & 0.79 & 0.71 \end{pmatrix}$$

The time to death outcome has a Weibull distribution with density  $f(t) = \gamma\lambda t^{\gamma-1} \exp(-\lambda t^\gamma)$ , where  $\gamma = 2.28$ , and  $\lambda$  follows the model:

$$\lambda_i = \exp[\epsilon_0 + \epsilon_1 \times (\beta_0 + b_{0,i}) + \epsilon_2 \times (\beta_1 + \beta_2 + b_{1,i}) + \epsilon_3 \times treat_i]$$

For these models, the following parameters were fixed:

- $\beta_0 = 43.3$ ;  $\beta_1 = -1.11$
- $\epsilon_0 = -7.55$ ;  $\epsilon_1 = -.042$ ;  $\epsilon_2 = -1.39$

The parameters  $\epsilon_3$  and  $\beta_2$  are the treatment effect parameters for survival and ALSFRS, respectively. We varied these as follows:

| Effect Size | $\epsilon_3$ | $\beta_2$ |
|-------------|--------------|-----------|
| None        | 0            | 0         |
| Mild        | $\log(4/6)$  | $1/6$     |
| Moderate    | $\log(3/6)$  | $2/6$     |
| Strong      | $\log(2/6)$  | $3/6$     |

### References

- [1] Giorgos Minas, Fabio Rigat, Thomas E Nichols, John AD Aston, and Nigel Stallard. A hybrid procedure for detecting global treatment effects in multivariate clinical trials: theory and applications to fmri studies. *Statistics in medicine*, 31(3):253–268, 2012.
- [2] Theodore Wilbur Anderson. *An introduction to multivariate statistical analysis*, volume 3. New York: Wiley-Interscience, 2003.
- [3] Brian C Healy and David Schoenfeld. Comparison of analysis approaches for phase iii clinical trials in amyotrophic lateral sclerosis. *Muscle & nerve*, 46(4):506–511, 2012.
